# Supplementary material for: 1700 nm optical coherence microscopy enables minimally invasive, label-free, in vivo optical biopsy deep in the mouse brain
Source: PubMed Central journal article supplement (PMC8280201; doi:10.1038/s41377-021-00586-7), 2021-07-14
Supplement: 41377_2021_586_MOESM1_ESM.pdf [file 41377_2021_586_MOESM1_ESM.pdf]

1 **Supplementary Information for**  
2 **1700 nm optical coherence microscopy enables minimally invasive, label-free, *in vivo* optical**  
3 **biopsy deep in the mouse brain**

4 **Short title: 1700 nm cellular deep brain optical biopsy**

5 Jun Zhu<sup>1</sup>, Hercules Rezende Freitas<sup>2</sup>, Izumi Maezawa<sup>2</sup>, Lee-way Jin<sup>2</sup>, and Vivek J. Srinivasan<sup>1,3,4,5,6,\*</sup>

6 <sup>1</sup>Department of Biomedical Engineering, University of California Davis, Davis, California, 95616, USA

7 <sup>2</sup>Department of Pathology and Laboratory Medicine, University of California Davis Medical Center,  
8 Sacramento, California, 95817, USA

9 <sup>3</sup>Department of Ophthalmology and Vision Science, School of Medicine, University of California Davis,  
10 Sacramento, California, 95817, USA

11 <sup>4</sup>Department of Ophthalmology, NYU Langone Health, New York, New York, 10017, USA

12 <sup>5</sup>Department of Radiology, NYU Langone Health, New York, New York, 10016, USA

13 <sup>6</sup>Tech4Health Institute, NYU Langone Health, New York, New York, 10010, USA

14

15 Jun Zhu: [znjzhu@ucdavis.edu](mailto:znjzhu@ucdavis.edu)

16 Hercules Rezende Freitas: [herculesrezendef@hotmail.com](mailto:herculesrezendef@hotmail.com)

17 Izumi Maezawa: [imaezawa@ucdavis.edu](mailto:imaezawa@ucdavis.edu)

18 Lee-way Jin: [lwjin@ucdavis.edu](mailto:lwjin@ucdavis.edu)

19 \*Vivek J. Srinivasan: [vsriniv@ucdavis.edu](mailto:vsriniv@ucdavis.edu), Phone: 530-752-9277

20 **Abstract**

21 This document provides supplementary information for “1700 nm optical coherence microscopy enables  
22 minimally invasive, label-free, *in vivo* optical biopsy deep in the mouse brain”. Here, we provide a more  
23 complete description of the optical coherence microscopy (OCM) system. We propose a robust, simple  
24 and novel approach for OCM chromatic dispersion quantification and numerical compensation, which is  
25 validated by independent experimental measurements. We show features of cortical lamination and  
26 myeloarchitecture from the mid-cortical to sub-cortical regions. Spectroscopic OCM estimation of cortical  
27 tissue composition is described. 3D visualizations of the 5xFAD Alzheimer’s disease transgenic mouse  
28 and its wild type littermate are provided. A co-registered comparison of OCM and histology is presented.  
29 In addition, the benefits of OCM over confocal microscopy are quantified. Degradation in the ability to  
30 resolve features with depth *in vivo* is estimated. We also illustrate optimization of the weighting function  
31 used for image fusion and display. Finally, our method of detecting the OCM depth of the focus is  
32 presented.

33

## 34 **S1. Chromatic dispersion compensation**

35 As the optical coherence microscopy (OCM) spectrum spanned a broad spectral range from 1560 to  
36 1820 nm (**Fig. S1a**), chromatic dispersion must be addressed to optimize axial image resolution.  
37 Dispersion mismatch between the sample and reference arms induces a nonlinearity in the spectral phase,  
38 so the point spread function (PSF) is chirped and broadened (**Fig. S1b-c**). Numerical dispersion  
39 compensation in post-processing can remove this spectral phase and optimize the OCM image quality.  
40 Unfortunately, reliable published data for dispersion of heavy water (D<sub>2</sub>O) and water (H<sub>2</sub>O) in this  
41 wavelength range are lacking, and it is uncertain if dispersion changes during focus translation as D<sub>2</sub>O is  
42 replaced by brain tissue along the optical path. Image-based metrics to optimize numerical dispersion  
43 compensation include image sharpness<sup>1</sup>, local image contrast<sup>2</sup> and alignment of subband images<sup>3</sup>.  
44 However such approaches are challenging to implement in images that lack well-defined features.

45 We empirically observed that optimal dispersion compensation minimized the width of the distribution of  
46 path lengths around the nominal focus, which we called the “apparent focal width (AFW)”. Remarkably,  
47 this observation held even when this distribution was significantly broadened due to light scattering while  
48 focusing deep into the sample (**Fig. S1d**). Based on this observation, we chose to optimize numerical  
49 dispersion compensation by minimizing the apparent focal width. The nonlinear spectral phase  
50 compensation ( $\phi_{NL}$ ) is:

$$51 \quad \phi_{NL} = \frac{1}{2}d_2(\omega - \omega_0)^2 + \frac{1}{6}d_3(\omega - \omega_0)^3, \quad (\text{S1})$$

52 where  $\omega$  is the angular optical frequency,  $\omega_0$  represents the central optical frequency, and  $d_2$  and  $d_3$  are  
53 coefficients compensating the group delay dispersion and third-order dispersion mismatches between the  
54 sample and reference arms, respectively. For given values of  $d_2$  and  $d_3$ , numerical calculation of the  
55 apparent focal width is:

$$56 \quad AFW(d_2, d_3) = \frac{1}{M} \sum_{j=1}^M W_j, \quad (\text{S2})$$

57 where  $W_j$  is the full width at  $X_j\%$  of the maximum PSF value. For this work,  $X_j$  values from 60% to 85%  
58 with 1% interval were used; therefore,  $M = 26$ . For each depth, width broadening (WB) is defined as:

59 
$$WB = AFW(d_2, d_3) - AFW_0, \quad (S3)$$

60 where minimum apparent focal width ( $AFW_0$ ) is subtracted from all  $AFW$  values. Surface plots (grid search)  
61 indicate changes of  $AFW$  and  $WB$  with coefficients  $d_2$  and  $d_3$  at different focal depths (**Fig. S1d-e**). Final  
62 optimized  $d_2$  and  $d_3$  values obtained by `fminsearch`<sup>4</sup> are consistent with grid search results. The  
63 `fminsearch` finds parameters to minimize  $AFW$  iteratively, requiring around 30 cycles to converge. As  
64 shown in **Fig. S1f**, optimum second-order dispersion compensation value increases by  $\sim 507 \text{ fs}^2$ , while  
65 systematic changes in the third-order value are undetectable, as focal depth increases from 0 to  $900 \mu\text{m}$ .  
66 This suggests that second-order dispersion dominates PSF broadening as brain tissue replaces  $\text{D}_2\text{O}$  along  
67 the optical path. This empirical result is directly confirmed in the next section (**Fig. S2**).

68

## 69 **S2. Dispersion measurements of $\text{H}_2\text{O}$ and $\text{D}_2\text{O}$ over the entire 1700 nm optical window**

70 Besides empirically assessing the dispersion *in vivo* in brain tissue via the  $AFW$  in the previous section,  
71 we also used the 1700 nm OCM system to measure the dispersion generated as  $\text{H}_2\text{O}$  directly replaces  
72  $\text{D}_2\text{O}$  in a cuvette. While this approach enabled a direct assessment of dispersion differences between  $\text{H}_2\text{O}$   
73 and  $\text{D}_2\text{O}$ , without the complication of scattering tissue, it is important to keep in mind that brain tissue is  
74 only  $\sim 75\%$  water and its chromatic dispersion may differ from pure  $\text{H}_2\text{O}$ .

75 Briefly, a 2 mm cuvette was inserted into the reference arm for dispersion measurements<sup>5</sup>. The spectral  
76 phase of the OCM interferogram was determined (**Fig. S2a**) when the cuvette was empty (filled with air,  
77 top panel) or filled with either  $\text{H}_2\text{O}$  or  $\text{D}_2\text{O}$  (bottom panel). The spectral phases were subtracted to yield:

78 
$$\Phi = 2[k_{\text{medium}}(\omega) - k_{\text{air}}(\omega)]L + \Phi_{\text{res.}}, \quad (S4)$$

79 where  $\Phi$  is the spectral phase change between the medium ( $\text{H}_2\text{O}$  or  $\text{D}_2\text{O}$ ) and air,  $k_{\text{medium}}$  and  $k_{\text{air}}$  are  
80 medium and air wavenumbers, respectively,  $\omega$  is optical angular frequency,  $L$  is the cuvette length (2 mm),  
81 and  $\Phi_{\text{res.}}$  is an unknown residual phase drift. As shown in **Fig. S2b-c**, the spectral phase change caused

82 by replacing 2 mm (4 mm double pass) air with H<sub>2</sub>O (black solid line) versus D<sub>2</sub>O (black dashed line) are  
 83 not the same. The nonlinear part of the spectral difference ( $\Delta\Phi_{NL}$ , blue curve), representing the difference  
 84 between H<sub>2</sub>O and D<sub>2</sub>O, is essentially what causes PSF broadening (**Fig. S2c**). With this measured  
 85 nonlinear phase, PSF broadening was predicted as the OCM focusing depth increases from 0 to 2 mm (4  
 86 mm double pass) deep in water (**Fig. S2d-e**). Second-order or group delay dispersion (GDD) was shown  
 87 to be dominant (**Fig. S2e**). Importantly, the *ex vivo* measurements of dispersion when H<sub>2</sub>O replacing D<sub>2</sub>O  
 88 agree with results of optimized *in vivo* dispersion correction (**Fig. S2f**). Also, as suggested by the larger  
 89 optical phase change across the spectrum, the group refractive index ( $c \times \partial k_{medium} / \partial \omega$ , where  $c$  is the  
 90 speed of light) of H<sub>2</sub>O was found to be 1.012 to 1.022 times that of D<sub>2</sub>O across the spectrum (**Fig. S2g-i**).

91

### 92 **S3. *In vivo* biopsy: cortical lamination and myeloarchitecture pattern**

93 OCM visualizes laminar cytoarchitecture and myeloarchitecture *in vivo* (**Fig. S3a**) and quantifies the  
 94 signal attenuation across the cortex (**Fig. S3b-c**). We also show variations of myeloarchitecture pattern  
 95 from mid-cortical to sub-cortical regions using OCM *in vivo* biopsy. As shown in **Fig. S4**, many short,  
 96 oblique axons present in mid cortex ( $Z < 650 \mu m$ ), therefore, they appear as individuals with different  
 97 orientations in transverse planes; whereas in deeper cortical layer ( $650 \mu m < Z < 900 \mu m$ ), axons orient  
 98 in the antero-posterior direction, with few exceptions, therefore, they show up as parallel groups  
 99 perpendicular to the coronal plane<sup>6</sup>. In corpus callosum and deeper regions ( $Z > 900 \mu m$ ), large fiber  
 100 bundles form and their orientations vary with depth.

101

### 102 **S4. Estimation of cortical composition**

103 Here, we show the derivation of subband OCM signal ratio for local lipid component change estimation.  
 104 Starting from Eq. (1), the OCM signal at focal depth  $Z$  and wavelength  $\lambda$  is given by:

105

$$I_{OCM}(Z, \lambda) = \mu_b(Z, \lambda) I_0(\lambda) e^{-2 \int_0^Z \mu_t(u, \lambda) du}, \quad (S5)$$

106 where  $\mu_b$  represents the backscattering coefficient,  $I_0$  is the reference OCM signal which is typically set at  
 107 the cortical surface, and  $\mu_t$  is the total attenuation coefficient. The signal ratio of two subbands is:

$$108 \quad \alpha = \frac{I_{OCM}(Z, \lambda_1)}{I_{OCM}(Z, \lambda_2)} = \frac{I_0(\lambda_1)\mu_b(Z, \lambda_1)}{I_0(\lambda_2)\mu_b(Z, \lambda_2)} e^{2\int_0^Z [\mu_t(u, \lambda_2) - \mu_t(u, \lambda_1)] du}. \quad (S6)$$

109 The natural logarithm of the signal ratio is:

$$110 \quad \ln(\alpha) = C_1 + \ln\left[\frac{\mu_b(Z, \lambda_1)}{\mu_b(Z, \lambda_2)}\right] + 2\int_0^Z [\mu_t(u, \lambda_2) - \mu_t(u, \lambda_1)] du, \quad (S7)$$

111 where  $C_1$  is the reference subband ratio constant. Assuming backscattering ratio of two subbands is fixed  
 112 with depth, the derivative of  $\ln(\alpha)$  with respect to  $Z$  becomes:

$$113 \quad \frac{d \ln(\alpha)}{dZ} = 2[\mu_t(Z, \lambda_2) - \mu_t(Z, \lambda_1)]. \quad (S8)$$

114 We recall that  $\mu_t(Z, \lambda)$  consists of scattering attenuation  $[\mu_{t,s}(Z, \lambda)]$ , water absorption  $[f_w(Z)\mu_{a,w}(\lambda)]$ , and  
 115 lipid absorption  $[f_l(Z)\mu_{a,l}(\lambda)]$ :

$$116 \quad \mu_t(Z, \lambda) = \mu_{t,s}(Z, \lambda) + f_w(Z)\mu_{a,w}(\lambda) + f_l(Z)\mu_{a,l}(\lambda), \quad (S9)$$

117 where  $f_w$  and  $f_l$  represent water and lipid volume fraction, and  $\mu_{a,w}$  and  $\mu_{a,l}$  are water and lipid absorption  
 118 coefficient, respectively. In summary, the total attenuation difference between the two subbands  
 119 determines slope of  $\ln(\alpha)$ , which can help infer changes in tissue components with cortical depth.

120

## 121 **S5. OCM imaging of wild type littermate versus AD mouse**

122 In contrast to the five-familial Alzheimer's disease (5xFAD) transgenic mouse, its wild type (WT)  
 123 littermate does not present features such as plaques, tissue loss and myelin degeneration (**Fig. S5**).  
 124 Myelinated axons are clearly visible in the WT littermate (**Fig. S6a**), while appearing diminished in deeper  
 125 layers of the AD mouse (**Fig. S6b**).

126

## 127 **S6. Comparison of *in vivo* OCM imaging with *ex vivo* histology**

128 A comparison between *in vivo* OCM and the corresponding anti-NeuN and FSB-stained histology was  
129 performed in the AD mouse. Briefly, after OCM imaging, the mouse was immediately sacrificed, and the  
130 brain was excised and fixed with 10% formalin. Then the fixed sample was embedded in Paraffin and  
131 sliced at 4 microns for imaging. Histology slices were co-stained with anti-NeuN (Abcam, MA, USA) and  
132 FSB (Sigma-Aldrich, MO, USA), and imaged with a commercial microscope (Nikon, NY, USA) at 10x  
133 magnification. Exposure time and gamma were adjusted to optimally visualize NeuN and FSB in individual  
134 images, which were combined as red and blue channels, respectively, of a single color image. Anatomical  
135 features depicted by the two modalities correspond (**Fig. S7a**). A hyporeflective shadow in OCM  
136 corresponds with a blood vessel (cyan arrow). Hyperscattering clusters in OCM correspond with FSB-  
137 labelled plaques (green arrows), though smaller FSB-labelled plaques are not always visualized on OCM.  
138 NeuN is seen in regions corresponding to hyporeflective regions in OCM (yellow asterisks), therefore low  
139 scattering in OCM is proposed to be related with demyelination, rather than neuronal loss. Plaque density  
140 was estimated both from the OCM volume and from histology (**Fig. S7b**). OCM appears to underestimate  
141 the plaque density relative to histology, but does correctly depict the trend of increasing plaque load with  
142 cortical depth (**Fig. S7b**). Differences between plaque densities estimated by OCM and histology could be  
143 due to the imaging contrast<sup>7,8</sup>. In OCM, the ability to detect plaques is affected by local contrast between  
144 the plaque backscattering, determined by composition and morphology, and the surrounding tissue  
145 backscattering background. Therefore, it is possible that our OCM is detecting a subpopulation of the  
146 amyloid plaques highlighted by FSB.

147

## 148 **S7. Benefits over confocal**

149 Compared to confocal microscopy<sup>9</sup>, the OCM approach better rejects multiply scattered and out-of-focus  
150 light. Coherence gating is achieved by a broadband light source (**Fig. S8a**, blue,  $\delta z$ ) and confocal gating  
151 is achieved by a high numerical aperture (NA) water immersion objective (**Fig. S8a**, red,  $2z_0$ ). Intensity  
152 profiles of the two gating effects in tissue show that confocal gating has a narrower full-width-at-half-

153 maximum (FWHM). However, we notice that the asymptotic decay of the confocal gate is more gradual  
154 than that of the coherence gate (**Fig. S8b**), suggesting that the coherence gate can further enhance the  
155 confocal gate.

156 The OCM approach provides a path length filter to selectively remove out-of-focus and multiply scattered  
157 light. Here, we demonstrate this concept by investigating the OCM signal slope as a function of the effective  
158 coherence gate width ( $\delta z_{eff}$ ). At each focus location ( $Z$ ), OCM intensity signal is 3D summed with different  
159 axial ranges, where  $\delta z_{eff}$  is the width of the coherence intensity profile convolved with a rectangular  
160 function that delineates the axial (depth) summation range. As  $\delta z_{eff}$  increases, OCM signal decays slower  
161 with depth (**Fig. S8c-d**), indicating increased detection of multiply scattered light<sup>10</sup>. This suggests that an  
162 OCM system that achieves high axial resolution by utilizing the entire water absorption window at 1700 nm  
163 rejects multiply scattered light more effectively than a system that only partially utilizes the 1700 nm  
164 window.

165

## 166 **S8. *In vivo* characterization of resolution**

167 While the system resolution was characterized *in vitro* in the main manuscript (**Fig. 8**), resolution may  
168 degrade *in vivo* due to multiple scattering and aberrations. To assess lateral (transverse) resolution  
169 degradation *in vivo*, we relied on salient OCM features: cell bodies and myelinated axons. In the axial  
170 direction, we used broadening of the apparent focal width (AFW) as an indirect indicator of broadening due  
171 to multiple scattering, which is the main source of degradation of both the PSF and AFW when imaging  
172 deep, if dispersion is compensated (**Fig. S1**). For each focus location, AFW was estimated (**Fig. S9a-b**).  
173 AFW increases with a deeper focus (**Fig. S9c**). In the transverse direction, line profiles of neuronal cell  
174 body edges and myelin were used to indicate the lateral resolution. Neuronal cell bodies were emphasized  
175 by minimum intensity projection (**Fig. S9d**), while myelinated axons were emphasized by maximum  
176 intensity projection (**Fig. S9g**). Regions of interests (ROIs) from the cell body edges were selected (as  
177 shown in **Fig. S9d**) and averaged perpendicular to the cell body edge to generate the edge or step



178 response. Then, the data was fitted with an error function to indirectly yield the lateral FWHM of the point  
179 or impulse response (**Fig. S9e**). For myelin, FWHMs were extracted directly from line profiles perpendicular  
180 to the axon axis (**Fig. S9g-h**). For both the cell body and myelin, a slight increase with depth is observed  
181 (**Fig. S9f, i**), suggesting resolution degradation *in vivo*. Note that this analysis provides evidence of  
182 resolution degradation, not direct estimates of resolution, since minimum or maximum intensity projections  
183 were analyzed, and since the intrinsic widths of the myelinated axon and cell body edge were neglected.

184

## 185 **S9. Despeckle vs. out-of-focus light rejection**

186 By combining coherence and confocal gates, optical coherence microscopy rejects multiply scattered  
187 and out-of-focus light. Image fusion in depth ( $z$ ) is intended to average structures in adjacent data volumes  
188 to reduce speckle. However, a structure that is in focus in one volume is slightly out-of-focus in the next.  
189 Therefore, a weighting function,  $h$ , which balances speckle reduction against out-of-focus light suppression  
190 (**Fig. S10a-b**), multiplied each data volume prior to image fusion. The weighting function is determined as  
191 the convolution (\*) of rectangular and Gaussian functions:

$$192 \quad h(z) = \text{rect}[z / (2z_w)] * e^{-2z^2/z_w^2}, \quad (\text{S10})$$

193 where  $z_w$  adjusts the width of  $h$ . As shown in **Fig. S10c**, when  $h$  gets narrower, the contrast of myelinated  
194 axons against the background neuropil is enhanced due to better rejection of multiply scattered light,  
195 however, less averaging leads to an image that is more corrupted by speckle. A weighting function FWHM  
196 ( $\delta$ ) of 11.4  $\mu\text{m}$  was chosen to balance the two effects.

197

## 198 **S10. Focus detection**

199 Here we describe our procedure to find the OCM depth ( $z$ ) of the focus [ $F_i(X, Y)$ ] for physical focusing  
200 depth  $Z_i$ , prior to weighting and image fusion. First, the maximum intensity location at each  $(X, Y)$  position  
201 is taken as a coarse approximation of the focus. This first estimate is noisy due to speckle. Next, a two-  
202 dimensional surface fit [up to second order with  $(X, Y)$  as variables] generates the smoother curve. Next,

203 the OCM focus depths at each  $(X, Y)$  coordinate are fitted by piecewise linear fitting versus physical depth  
204  $Z$ . The slope in layer  $l$  is presumed to be different from that of other layers. This fit or interpolation also  
205 corrects for focus detection errors caused by anatomical features (for instance, highly scattering white  
206 matter biases the OCM depth of the focus inferred from the maximum intensity alone).

207

## 208 **References**

- 209 1 Wojtkowski, M. *et al.* Ultrahigh-resolution, high-speed, Fourier domain optical coherence  
210 tomography and methods for dispersion compensation. *Optics express* **12**, 2404-2422 (2004).
- 211 2 Xu, D., Huang, Y. & Kang, J. U. Compressive sensing with dispersion compensation on non-linear  
212 wavenumber sampled spectral domain optical coherence tomography. *Biomedical Optics Express*  
213 **4**, 1519-1532 (2013).
- 214 3 Kho, A. & Srinivasan, V. J. Compensating spatially dependent dispersion in visible light OCT.  
215 *Optics letters* **44**, 775-778 (2019).
- 216 4 Lagarias, J. C., Reeds, J. A., Wright, M. H. & Wright, P. E. Convergence properties of the Nelder-  
217 Mead simplex method in low dimensions. *SIAM Journal on optimization* **9**, 112-147 (1998).
- 218 5 Zhang, T., Kho, A. M. & Srinivasan, V. J. Water wavenumber calibration for visible light optical  
219 coherence tomography. *Journal of Biomedical Optics* **25**, 090501 (2020).
- 220 6 Morrison, J. H., Grzanna, R., Molliver, M. E. & Coyle, J. T. The distribution and orientation of  
221 noradrenergic fibers in neocortex of the rat: an immunofluorescence study. *Journal of Comparative*  
222 *Neurology* **181**, 17-39 (1978).
- 223 7 Gesperger, J. *et al.* Comparison of intensity-and polarization-based contrast in amyloid-beta  
224 plaques as observed by optical coherence tomography. *Applied Sciences* **9**, 2100 (2019).
- 225 8 Lichtenegger, A. *et al.* Ex-vivo Alzheimer's disease brain tissue investigation: a multiscale approach  
226 using 1060-nm swept source optical coherence tomography for a direct correlation to histology.  
227 *Neurophotonics* **7**, 035004 (2020).

228 9 Xia, F. *et al.* In vivo label-free confocal imaging of the deep mouse brain with long-wavelength  
229 illumination. *Biomedical optics express* **9**, 6545-6555 (2018).

230 10 Jacques, S. L., Wang, B. & Samatham, R. Reflectance confocal microscopy of optical phantoms.  
231 *Biomedical optics express* **3**, 1162-1172 (2012).

232

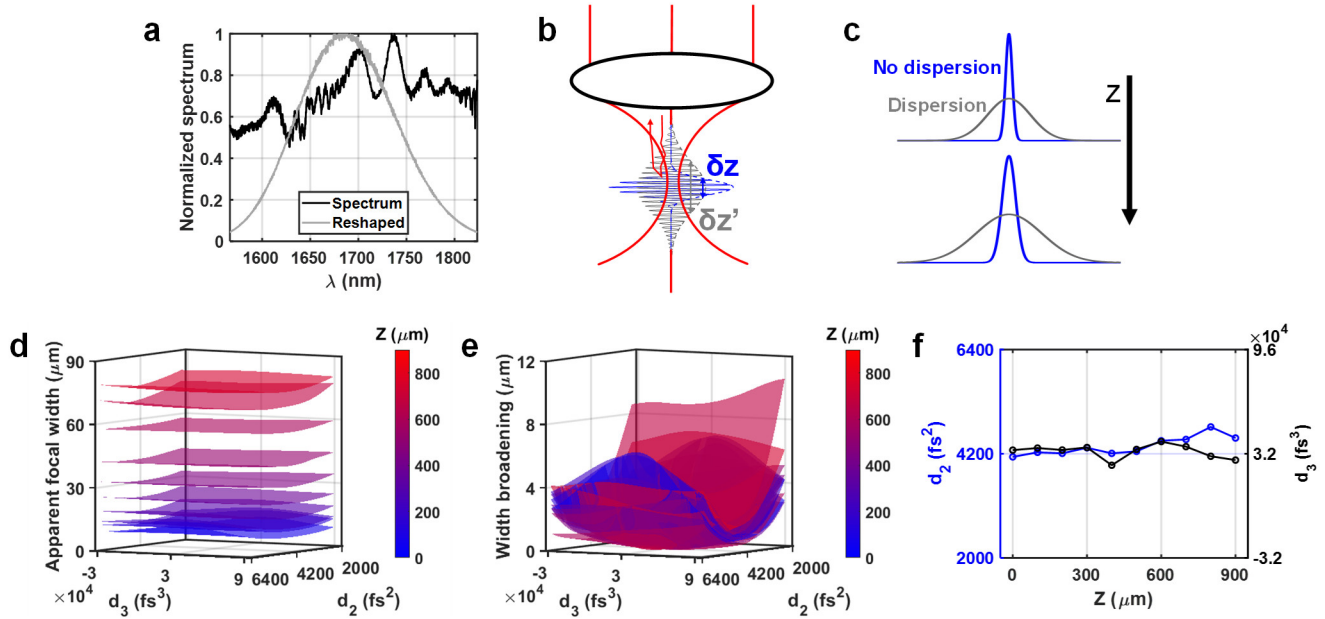

233  
234  
235  
236  
237  
238  
239  
240  
241  
242  
243  
244

**Fig. S1 Proposed method of numerical dispersion compensation in high numerical aperture (NA) OCM.** **a** Registered reference spectrum (black). For mouse brain imaging, the spectrum is reshaped to be Gaussian (gray) with a 120 nm FWHM. **b** Chromatic dispersion induces a nonlinearity in the spectral phase, so the point spread function (PSF) is chirped and broadened (gray,  $\delta z'$ ) compared to the ideal case with no dispersion (blue,  $\delta z$ ). Multiply scattered paths (red) represent an additional source of broadening. **c** Thus, the width of the distribution of OCM depths (i.e., path length divided by 2) increases with focal depth ( $Z$ ) due to multiple scattering (blue), and uncompensated dispersion results in further broadening (gray). The width of the distribution of OCM depths suggests optimal dispersion compensation coefficients, as seen from visualizations of the apparent focal width (**d**) and relative width broadening (**e**) at different focal depths. **f** The optimal second-order dispersion compensation coefficient ( $d_2$ ) increases slightly with depth while changes in the third-order coefficient ( $d_3$ ) are not detectable.

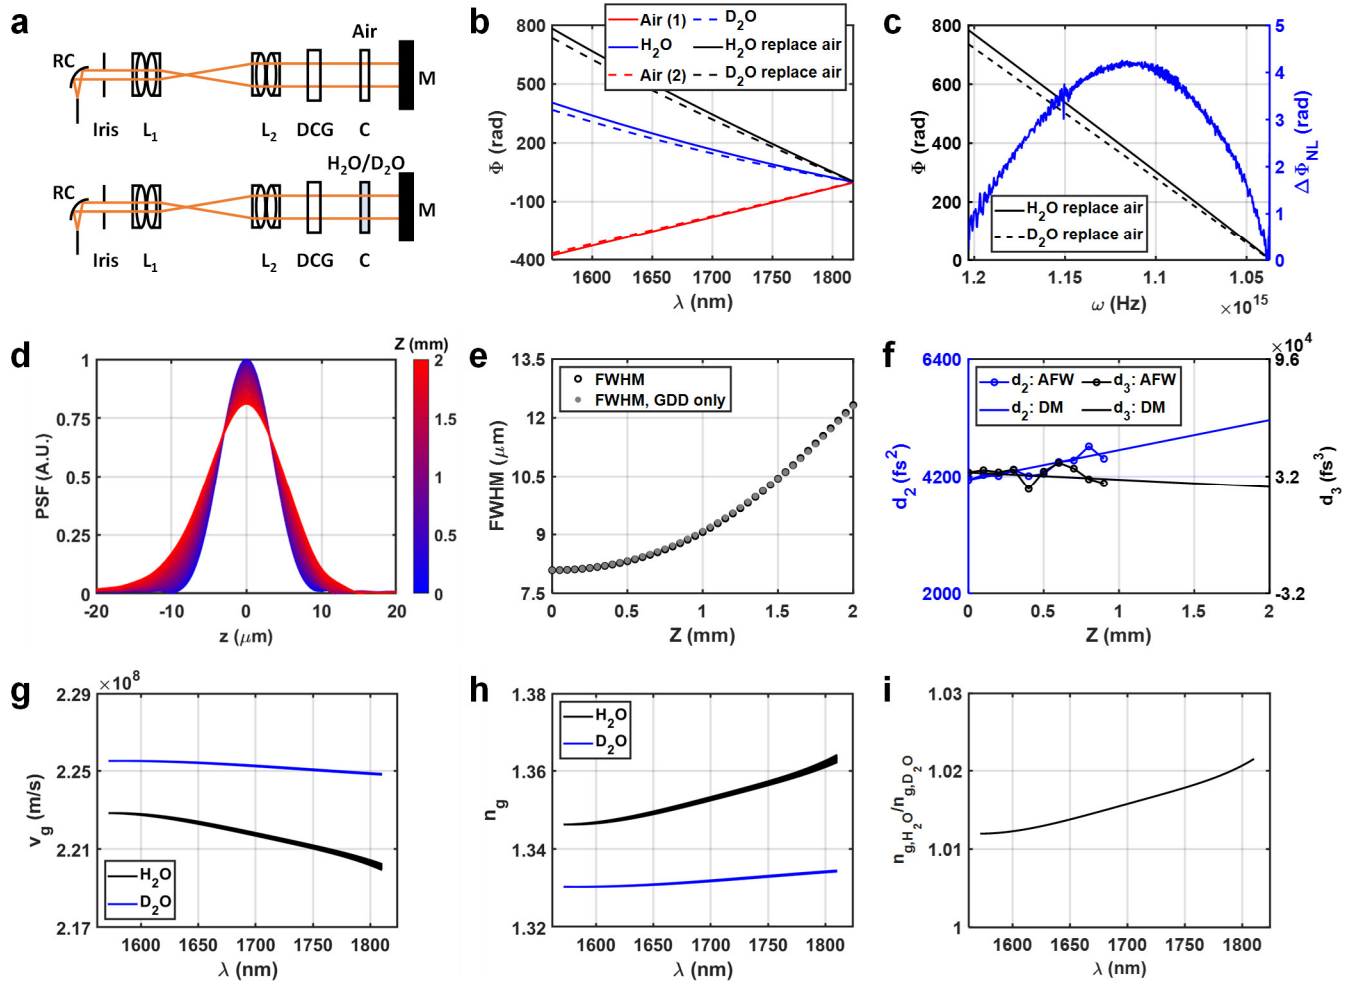

245  
246  
247  
248  
249  
250  
251  
252  
253  
254  
255  
256  
257  
258  
259  
260  
261  
262

**Fig. S2 Chromatic dispersion in the 1700 nm optical window.** **a** Reference arm setup for dispersion measurements (sample arm not shown). The cuvette is either empty (filled with air, top panel) or filled with H<sub>2</sub>O or D<sub>2</sub>O (bottom panel). RC: reflective collimator; L<sub>1</sub>, L<sub>2</sub>: lenses (achromatic doublet pairs); DCG: dispersion compensation glass; C: cuvette; M: mirror. **b** Spectral phase ( $\phi$ ) of interferogram when a 2 mm cuvette in the reference arm is filled with H<sub>2</sub>O (blue solid line), D<sub>2</sub>O (blue dashed line) and air (red lines). Due to dispersion mismatch between arms, only phase changes between conditions are analyzed. Spectral phase changes when H<sub>2</sub>O (black solid line) or D<sub>2</sub>O (black dashed line) replaces 4 mm air (double pass path length), versus wavelength (**b**) and angular optical frequency (**c**), with the latter revealing a nonlinear spectral phase induced by replacing D<sub>2</sub>O with H<sub>2</sub>O [blue curve in (**c**)]. PSF axial profiles (**d**) and FWHMs (**e**) as H<sub>2</sub>O replaces D<sub>2</sub>O shows degradation of axial resolution up to 2 mm depth, as expected during deep focusing in OCM without compensating focus-dependent dispersion. GDD: group delay dispersion. **f** Optimized depth-dependent second ( $d_2$ ) and third-order ( $d_3$ ) dispersion compensation values obtained from dispersion measurement (DM) agree well with the apparent focal width (AFW) analysis (reproduced from **Fig. S1f**). Group velocity (**g**,  $v_g$ ) and group refractive index (**h**,  $n_g$ ) of H<sub>2</sub>O (black) and D<sub>2</sub>O (blue) obtained from spectral phase measurements. Calibrated limits of the system wavelength range are  $1566.7 \pm 2.1$  and  $1817.3 \pm 2.8$  nm. Shaded areas in (**g**)-(**h**) represent the range of solutions, accounting for wavelength calibration errors. **i** Group refractive index ratio of H<sub>2</sub>O to D<sub>2</sub>O.

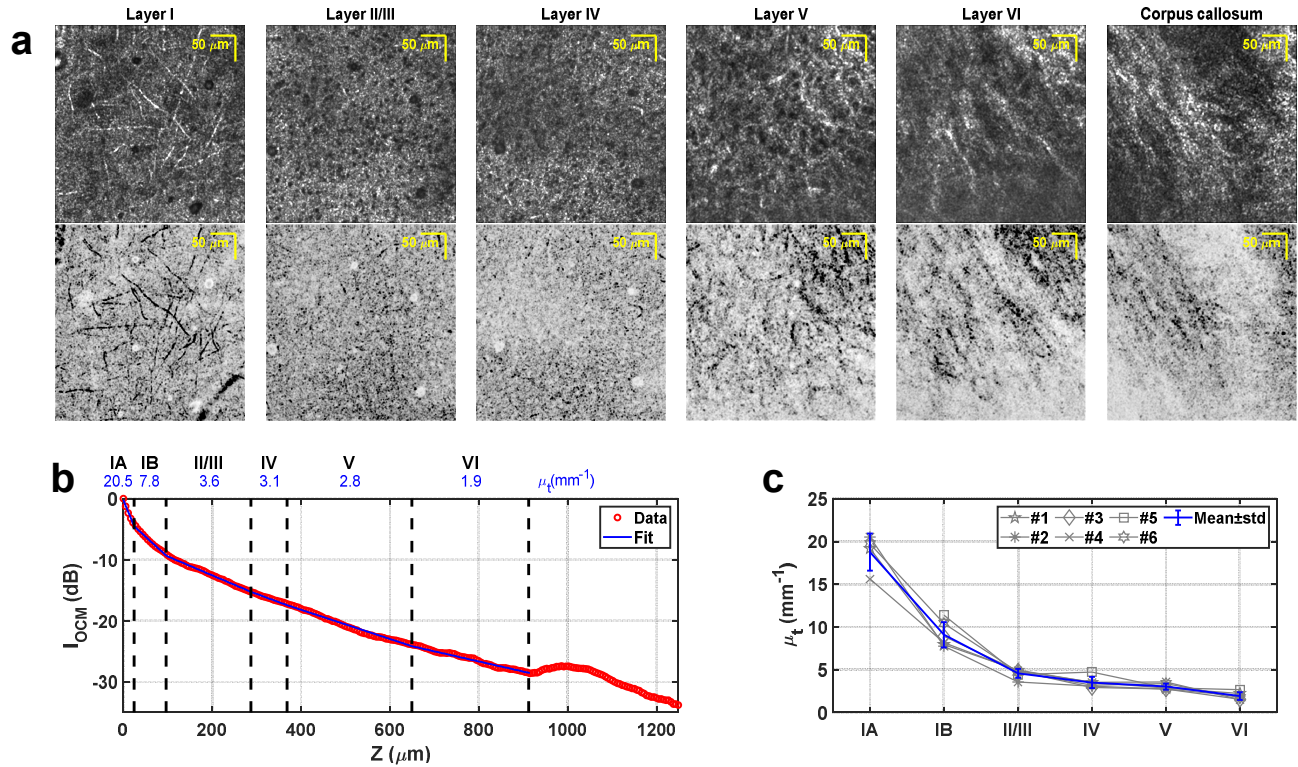

263  
264  
265  
266  
267  
268  
269

**Fig. S3 Analysis of cortical lamination.** **a** *En face* images of neuronal cell bodies (top row) and myelinated axons (inverted gray scale, bottom row) from the cortex and corpus callosum exhibit laminar trends of cytoarchitecture and myeloarchitecture, respectively. **b** Layer-by-layer attenuation coefficients are quantified with piecewise linear fitting (blue line) of background corrected OCM signal (red circles) versus depth. **c** Total attenuation coefficients of six animals (gray), with mean  $\pm$  std (blue).

### Myelinated axons

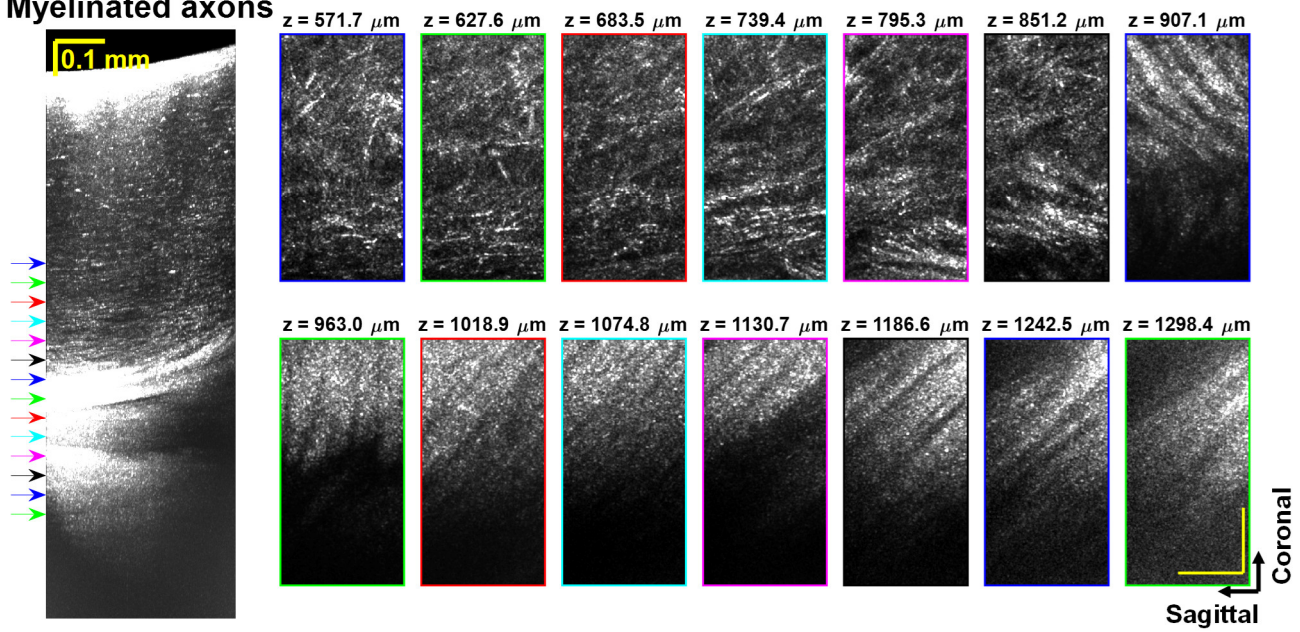

270  
271  
272  
273  
274

**Fig. S4 *In vivo* visualization of myeloarchitecture.** Outline colors of *en face* images correspond to arrow colors on the coronal image on the left, indicating projection locations. Axial projection depth: 11.2  $\mu\text{m}$ . Coronal slice projection thickness: 190  $\mu\text{m}$ . Scalebars represent 0.1 mm and apply to all the *en face* images.

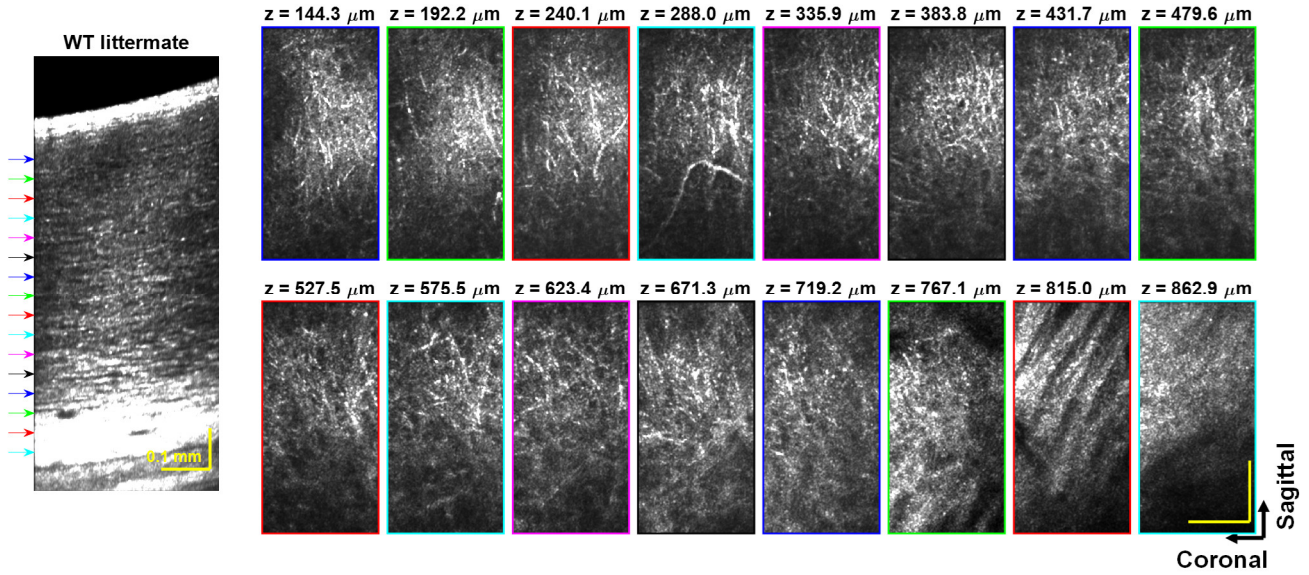

275  
276  
277  
278  
279  
280

**Fig. S5 3D biopsy of the WT littermate.** Transverse images formed by processing to enhance plaques, similar to **Fig. 6e**. Outline colors of *en face* images correspond to arrow colors on the sagittal images on the left, indicating projection locations. Sagittal slice projection thickness: 17.8  $\mu\text{m}$ . Axial projection depth: 16.0  $\mu\text{m}$ . Scalebars represent 0.1 mm and apply to all the *en face* images.



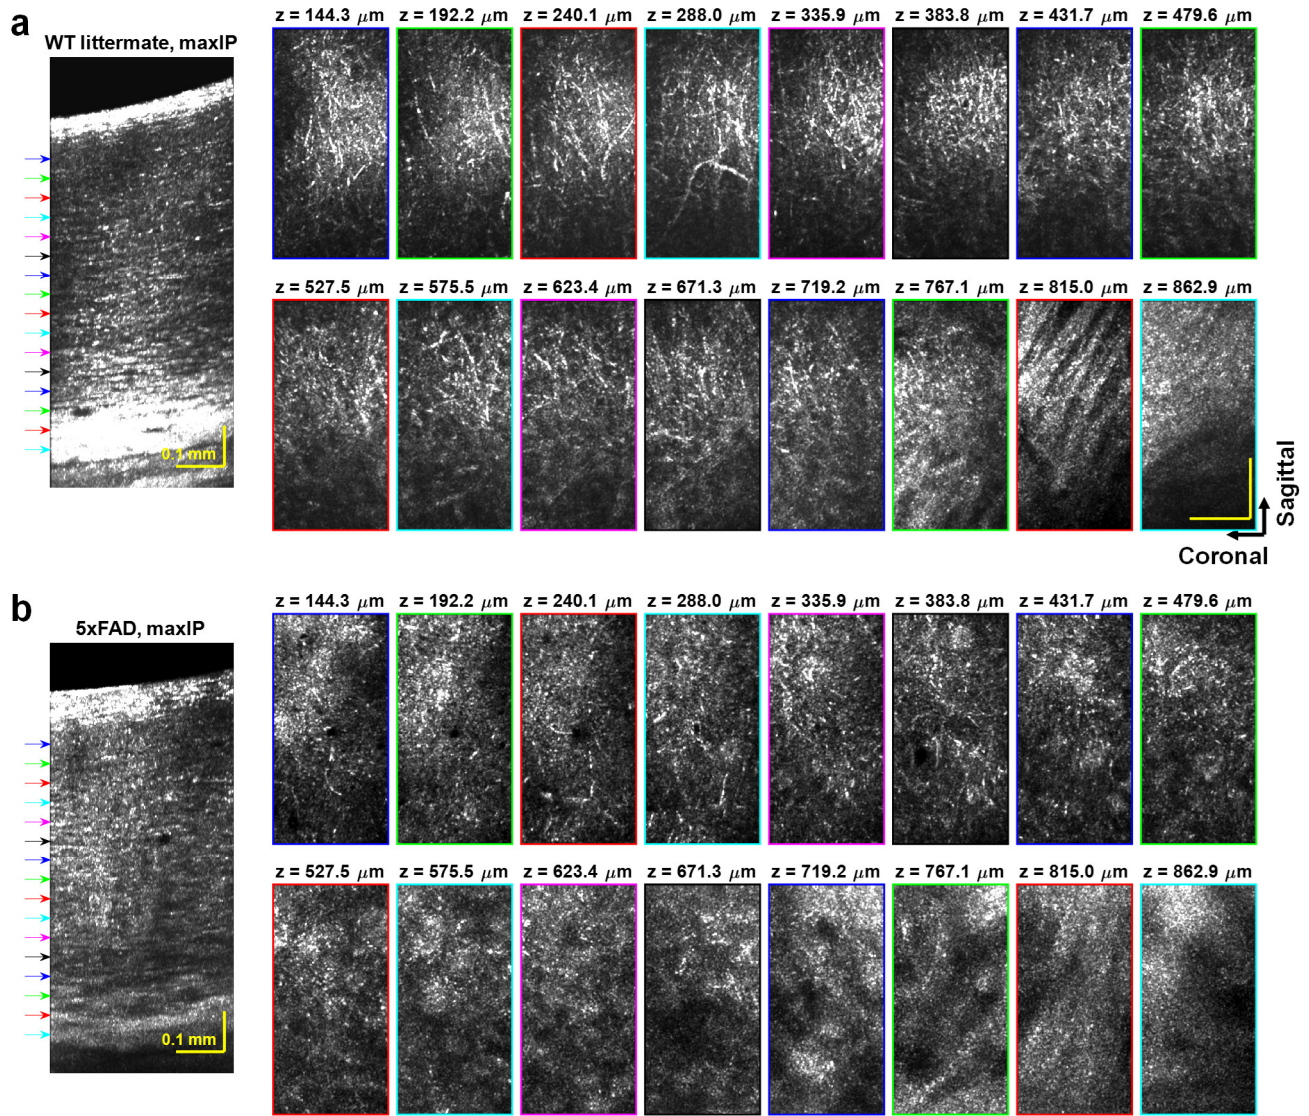

281  
 282 **Fig. S6 Maximum intensity projection (maxIP) images of the WT littermate (a) and the 5xFAD mouse (b).**  
 283 Outline colors of *en face* images correspond to arrow colors on the sagittal images on the left, indicating projection  
 284 locations. Sagittal slice projection thickness: 17.8  $\mu\text{m}$ . Axial projection depth: 16.0  $\mu\text{m}$ . Scalebars represent 0.1 mm  
 285 and apply to all the *en face* images.  
 286

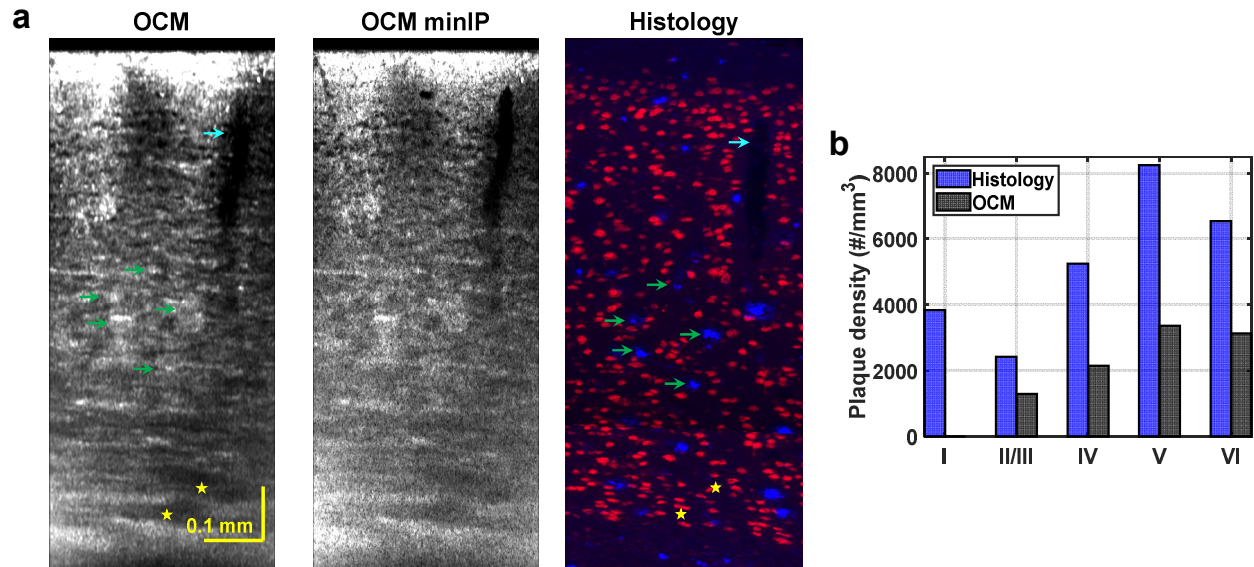

287  
288  
289  
290  
291  
292  
293  
294  
295

**Fig. S7 Comparison of *in vivo* OCM imaging with *ex vivo* histology.** **a** *In vivo* OCM imaging (left and middle) versus *ex vivo* histology (right). In the histological image, neuronal cell bodies are delineated by anti-NeuN staining (red), while amyloid plaques are highlighted by FSB staining (blue). Corresponding anatomical features include a blood vessel (cyan arrow), plaques (green arrows), and possible demyelination (yellow asterisks). OCM slice summation or minimum intensity projection (minIP) thickness: 17.8  $\mu\text{m}$ . Histology slice thickness: 4  $\mu\text{m}$ . Scalebars represent 0.1 mm and apply to all images. **b** Although differences are observed between OCM and histology, both modalities depict increasing plaque load in deep cortical layers.

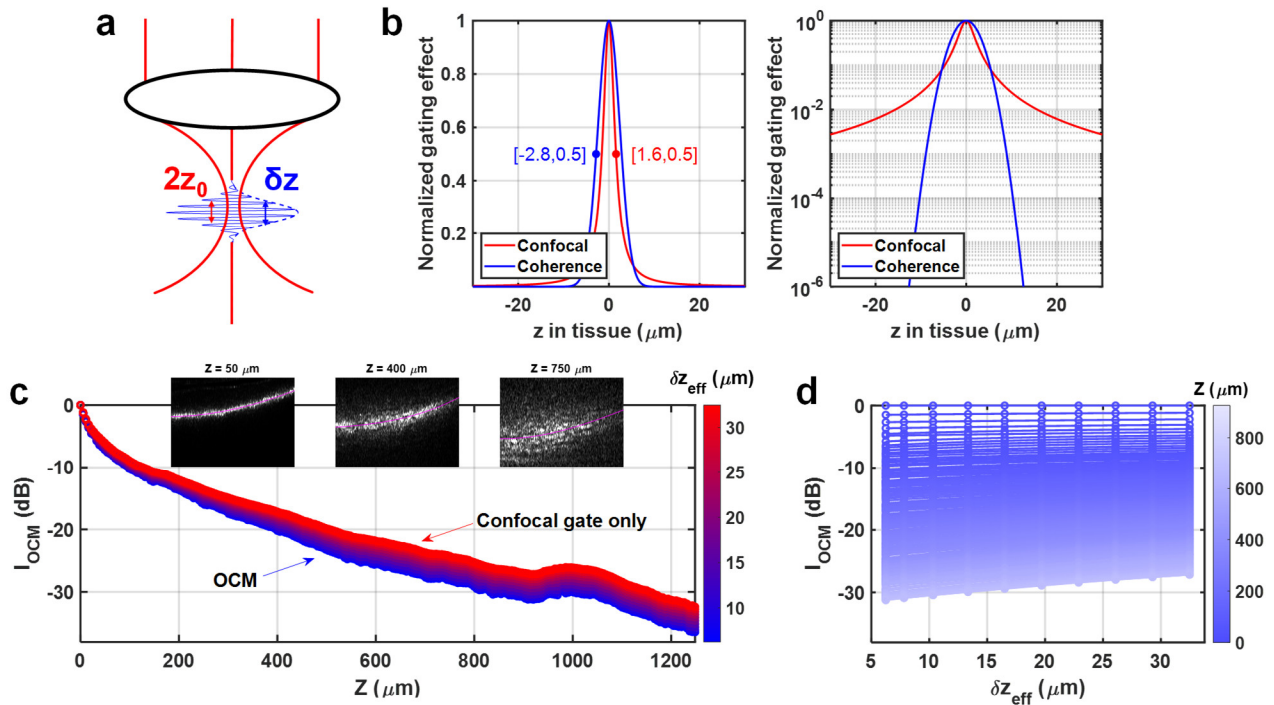

**Fig. S8 Coherence gating complements confocal gating to reject multiply scattered light.** **a** Coherence gate (blue,  $\delta z$ ) and confocal gate (red,  $2z_0$ ). **b** Intensity profiles of the two gates, shown in linear (left panel) and logarithmic (right panel) scales. **c-d** With a digitally-broadened coherence gate ( $\delta z_{\text{eff}}$ ), the OCM signal decays slower with depth, suggesting inclusion of more multiply scattered light. Note that a large  $\delta z_{\text{eff}}$  compared to  $2z_0$  results in only a confocal gate (red in **c**). Insets in (**c**) show broadening in OCM depth (proportional to path length) about the detected focus, suggesting that with a deep tissue focus, relatively more multiply scattered light passes the confocal gate.

296  
297  
298  
299  
300  
301  
302  
303

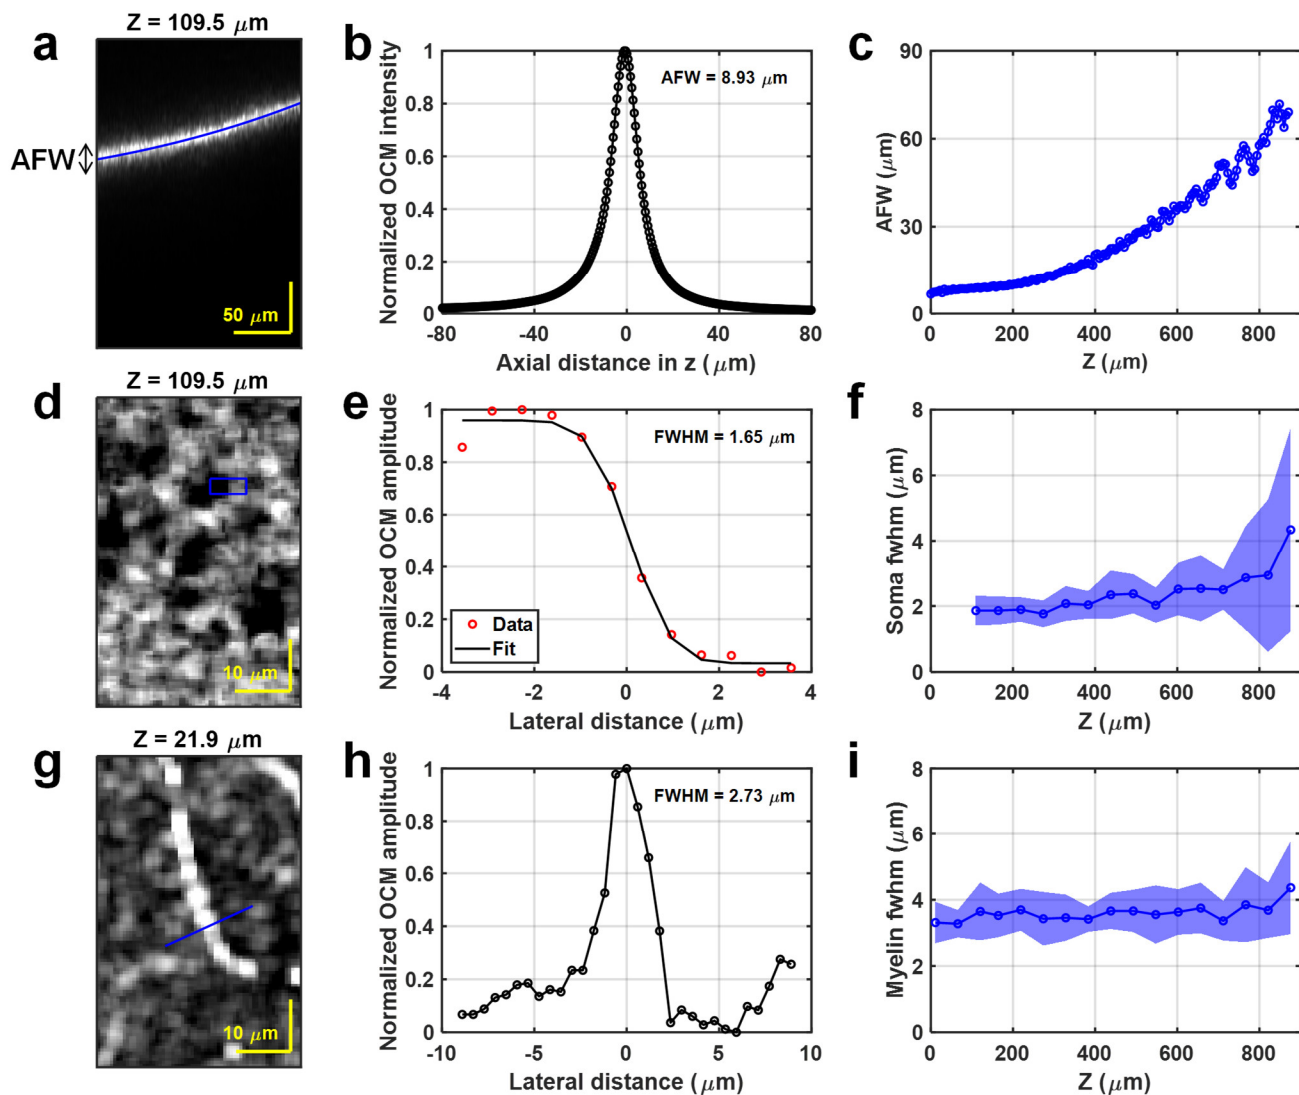

304  
 305  
 306  
 307  
 308  
 309  
 310  
 311  
 312  
 313  
 314  
 315

**Fig. S9 Investigation of resolution degradation *in vivo*.** Apparent focal width (AFW) (a-c), transverse FWHMs estimated from soma boundary profiles (d-f) and transverse FWHMs estimated from myelin profiles (g-i). The AFW (a), calculated similar to Fig. S1d based on the OCM intensity (b), shows a clear degradation with depth (c). To analyze the soma boundary, the amplitude in the blue boxed region in (d) is averaged along the vertical direction to generate the edge or step response (red circles, e), and then fitted with an error function (black line, e) to indirectly yield the lateral FWHM of the impulse response (e). The FWHM degradation with depth (f), with shaded regions representing standard deviations across 12 soma boundaries per depth, is subtle. To analyze myelin profiles, the amplitude profile perpendicular to the myelin axis (g) is calculated (h), and the lateral FWHM is determined directly (h). The degradation with depth (i), with shaded regions representing standard deviations across 92 axon cross sections per depth, is also subtle, consistent with (f).

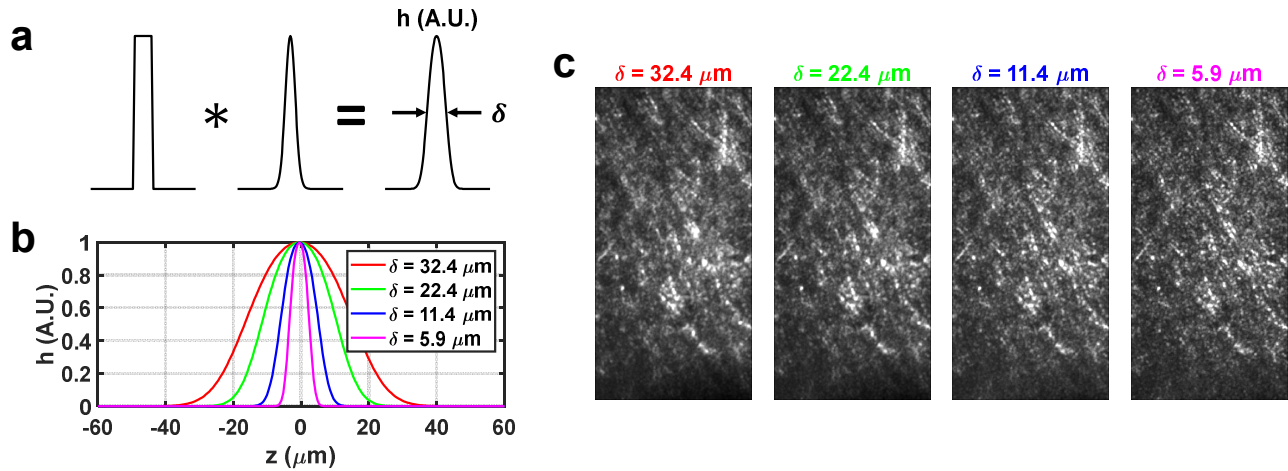

316

317

318

319

320

**Fig. S10 Optimization of axial weighting function ( $h$ ).** **a** The shape of  $h$  is given by convolution of rectangular and Gaussian functions. **b** Axial weighting functions with different full-widths-at-half-maximum (FWHMs) ( $\delta$ ). **c** *En face* images at the same nominal cortical depth, derived from different weighting functions, exemplify the tradeoff between speckle reduction (large  $\delta$ ) and out-of-focus light suppression (small  $\delta$ ).
